# Supplementary material for: Modulation of pKa by cyclodextrins; subtle structural changes induce spectacularly different behaviors
Source: Royal Society of Chemistry journal article supplement (doi:10.1039/c5ra14032c), 2015-01-01
Supplement: c5ra14032c1.pdf [file c5ra14032c1.pdf]

## Electronic Supplementary Information

### **Modulation of $pK_a$ by cyclodextrins; subtle structural changes induce spectacularly different behaviors**

*Paweł M. Nowak<sup>a</sup>, Michał Woźniakiewicz<sup>a\*</sup>, Mariusz P. Mitoraj<sup>b</sup>, Magdalena Garnysz<sup>a</sup>, Paweł Kościelniak<sup>a</sup>*

- a. Department of Analytical Chemistry, Faculty of Chemistry, Jagiellonian University, R. Ingardena 3,  
30-060 Krakow, Poland.
  
- b. Department of Theoretical Chemistry, Faculty of Chemistry, Jagiellonian University, R. Ingardena 3,  
30-060 Krakow, Poland

Table S-1. Composition and predicted pH of all BGEs (background electrolytes) prepared for experiments, calculated for 50 mL total volume and 100 mM ionic strength.

| <b>pH</b>           | <b>Buffer composition [mL]</b>                                            |                                           |
|---------------------|---------------------------------------------------------------------------|-------------------------------------------|
| Phosphate buffer I  | H <sub>3</sub> PO <sub>4</sub> (100 mM)                                   | NaH <sub>2</sub> PO <sub>4</sub> (100 mM) |
| 2.50                | 18.52                                                                     | 4.80                                      |
| 3.50                | 1.83                                                                      | 4.98                                      |
| Acetic buffer       | CH <sub>3</sub> COOH (500 mM)                                             | CH <sub>3</sub> COONa (500 mM)            |
| 4.50                | 14.16                                                                     | 10.00                                     |
| 5.50                | 1.42                                                                      | 10.00                                     |
| Phosphate buffer II | NaH <sub>2</sub> PO <sub>4</sub> (100 mM)                                 | Na <sub>2</sub> HPO <sub>4</sub> (100 mM) |
| 6.00                | 3.59                                                                      | 4.70                                      |
| 7.00                | 1.01                                                                      | 13.29                                     |
| 8.00                | 0.12                                                                      | 16.25                                     |
| Borate buffer       | Na <sub>2</sub> B <sub>4</sub> O <sub>7</sub> ·10H <sub>2</sub> O (50 mM) | NaOH (1 M)                                |
| 9.20                | 48.42                                                                     | 0.16                                      |

Above data were obtained from the PHoEBuS 1.3 software by Analis (Namur, Belgium).
